# Supplementary material for: A highly effective peroxidase-mimic nanozyme of S, N-carbon dot-decorated cerium organic framework-based colorimetric detection of Hg2+ ion and thiophanate methyl
Source: Royal Society of Chemistry journal article supplement (doi:10.1039/d4ay00636d), 2024-01-01
Supplement: d4ay00636d1.pdf [file d4ay00636d1.pdf]

**A highly effective peroxidase mimic nanozyme of S, N-Carbon dots decorated Cerium organic framework based colorimetric detection of Hg<sup>2+</sup> ion and thiophanate methyl**

**Rajakumari Jesuraj <sup>a</sup>, Panneerselvam Perumal <sup>a\*</sup>**

<sup>a</sup> Department of Chemistry, SRM Institute of Science and Technology, Kattankulathur, 603 203, Tamil Nadu, India.

\* Corresponding Author-Dr. Panneerselvam Perumal- Department of Chemistry, SRM Institute of Science and Technology, Kattankulathur, 603 203, Tamil Nadu, India; E-mail: [panneerp1@srmist.edu.in](mailto:panneerp1@srmist.edu.in); [panneerchem82@gmail.com](mailto:panneerchem82@gmail.com); Phone: +91 9688538842; ORCID: <https://orcid.org/0000-0003-2647-6835>.

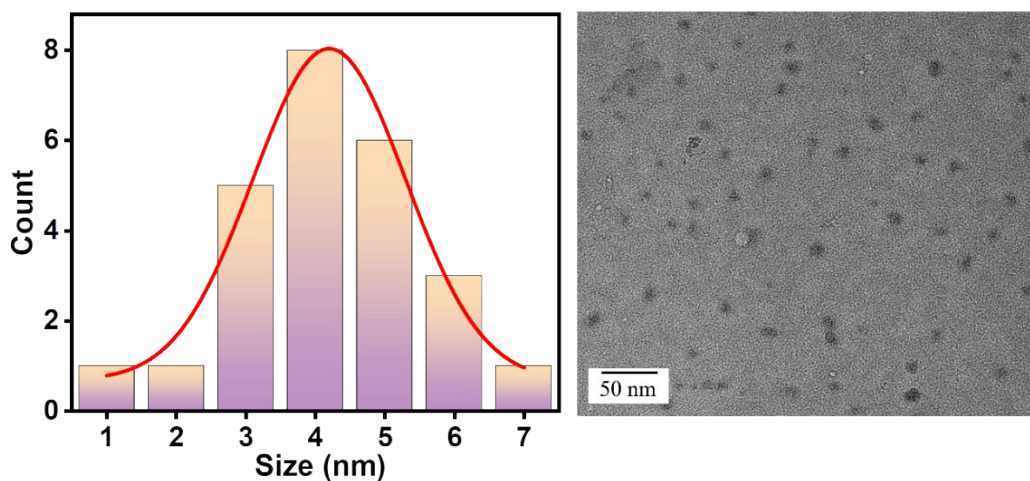

Figure S1. Particle size distribution histogram for S, N-CDs

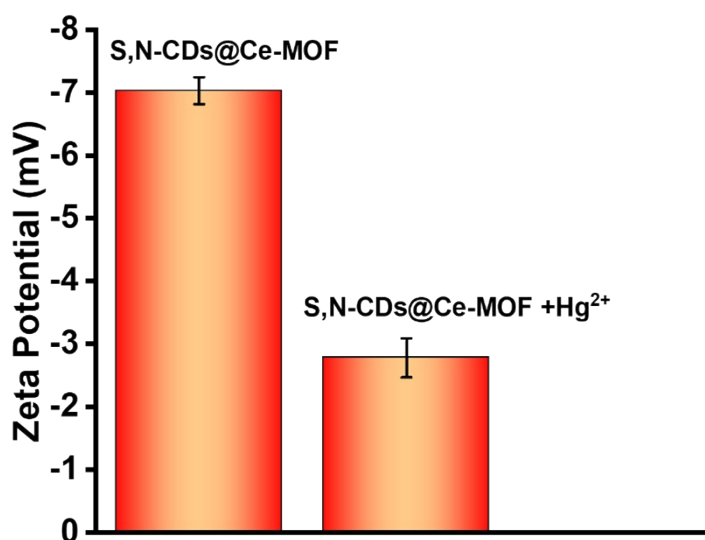

Figure S2 Zeta analysis before and after the addition of Hg<sup>2+</sup>

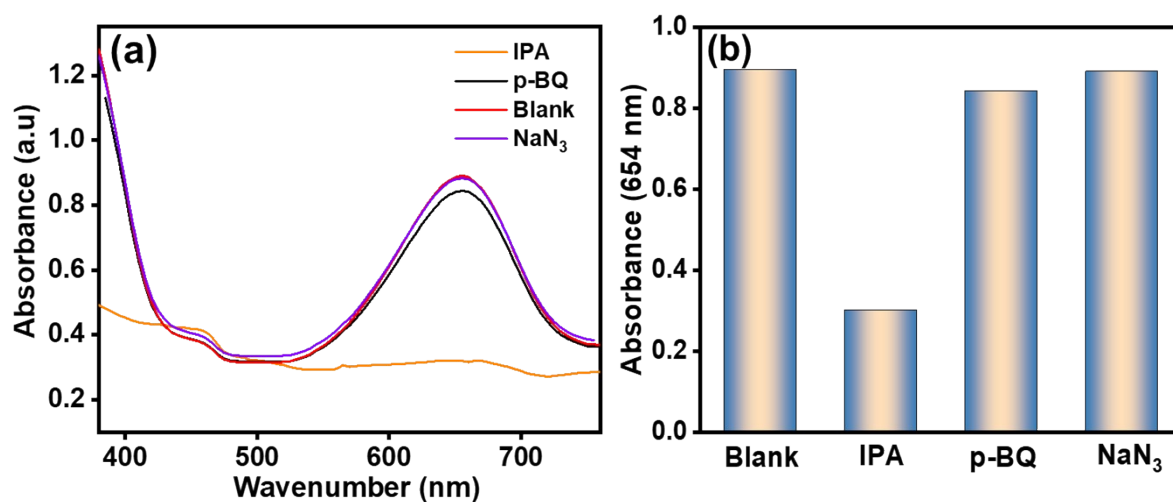

Figure S3. Radical confirmation analysis

We looked at a selectivity analysis for Hg<sup>2+</sup> and TM with sugar, ions, and amino acids (**Figure S4 a-b**). However, sugars, ions, and amino acids do not interfere with the detection of Hg<sup>2+</sup>. Meanwhile, in TM detection amino acids have a minor interference but it takes double the time and quantity needed compared to the detection of TM so it's negligible. However, minor interference also prohibited by using a NEM masking agent.

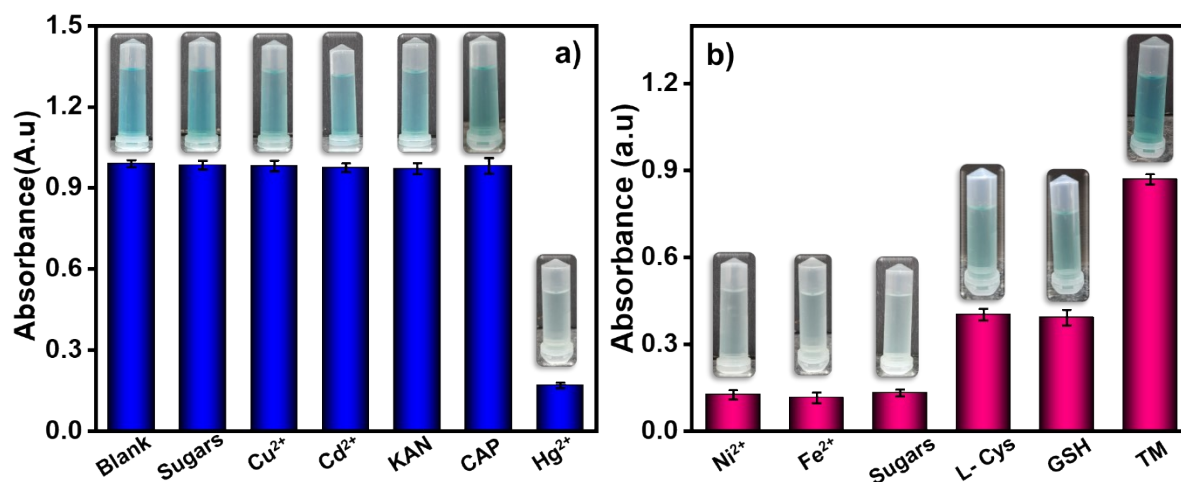

**Figure S4. (a-b)** Selectivity analysis for Hg<sup>2+</sup> and TM with sugars, ions, and amino acids respectively.

#### Kinetic analysis of S, N-CDs@Ce-MOF Nanozyme

Using a steady-state kinetics, the peroxidase-like catalytic performance of S, N-CDs@Ce-MOF with TMB and H<sub>2</sub>O<sub>2</sub> as substrates. In brief, the experiment was carried out by varying the concentration of H<sub>2</sub>O<sub>2</sub> from 0.5 to 5 mM while TMB at 2 mM as fixed concentration and repeating the experiment by varying the concentration of TMB from 0.5 to 4 mM while H<sub>2</sub>O<sub>2</sub> at 3 mM concentration. In addition, the Michaelis-Menten curves and Lineweaver–Burk plots for H<sub>2</sub>O<sub>2</sub> and TMB are shown in **FigS5**. S, N-CDs@Ce-MOF nanozyme's Michaelis-Menten constant (K<sub>m</sub>) and maximal reaction velocity (V<sub>max</sub>), were calculated using the Lineweaver–Burk double reciprocal equation (1).

$$\frac{1}{V} = \frac{K_m}{V_{max}} \frac{1}{[S]} + \frac{1}{V_{max}} \quad (1)$$

Where V<sub>max</sub> is the maximal reaction velocity, V is the initial velocity, and [S] is the substrate concentration, K<sub>m</sub> is the Michaelis constant. In this case, the enzyme's catalytic activity is shown by the V<sub>max</sub> value, while the K<sub>m</sub> value indicates the affinity of the enzyme to the substrate. The K<sub>m</sub> value of S, N-CDs@Ce-MOF using H<sub>2</sub>O<sub>2</sub> and TMB were 0.828mM and 1.145 mM respectively. The V<sub>max</sub> values of the S, N-CDs@Ce-MOF with H<sub>2</sub>O<sub>2</sub> and TMB

substrates were  $2.50 (10^{-8} \text{ Ms}^{-1})$  and  $5.17 (10^{-8} \text{ Ms}^{-1})$  respectively. **Table S1** provides the  $K_m$  value and the  $V_{\text{max}}$  value of the S, N-CDs@Ce-MOF with comparison to other nanozymes. As a result, S, N-CDs@Ce-MOF have a good binding affinity towards  $\text{H}_2\text{O}_2$  and TMB which enhanced the catalytic activity.

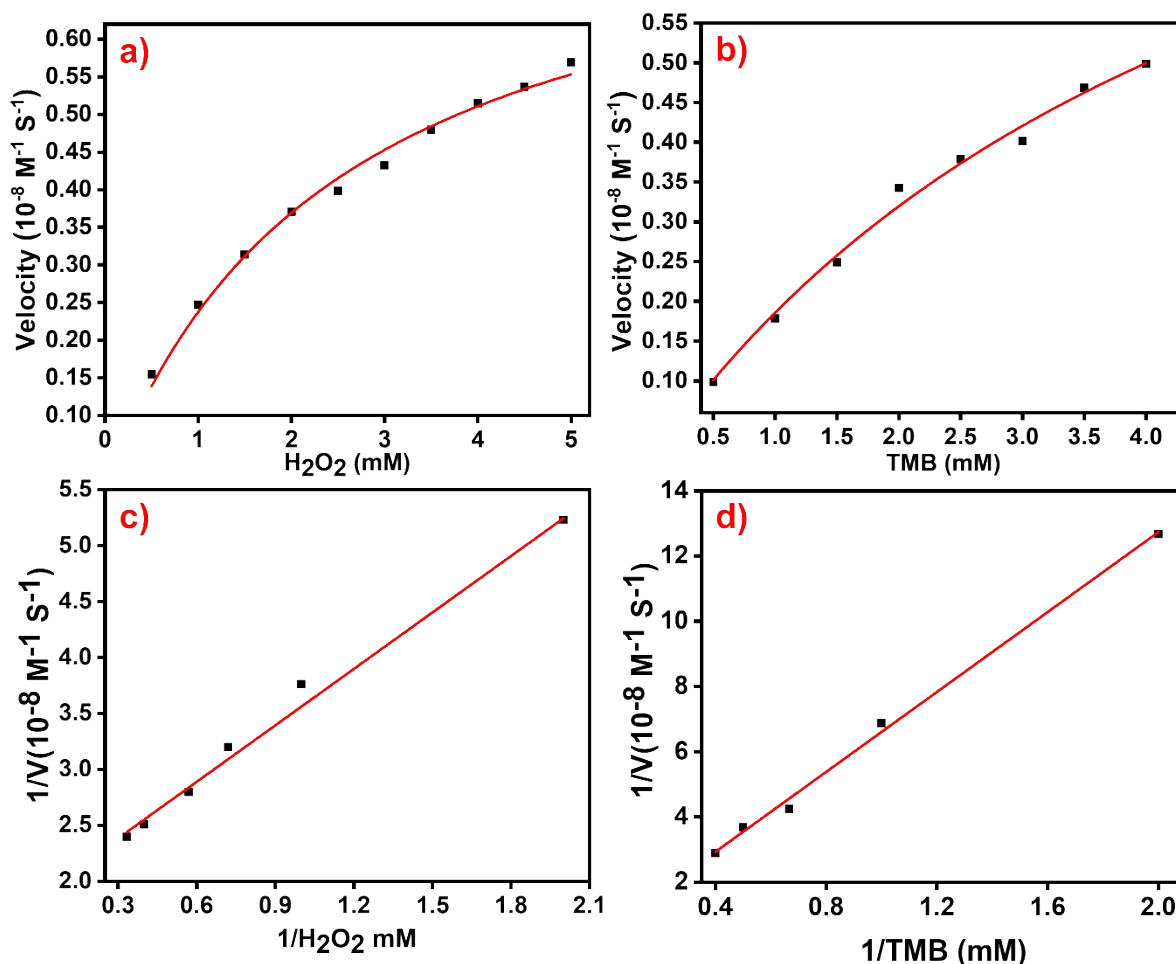

**Figure S5.** Steady-state kinetic assay of S, N-CDs@Ce-MOF by using (a and b) Michaelis-Menten curve for  $\text{H}_2\text{O}_2$  and TMB and (c and d) Lineweaver–Burk plots of the double reciprocal of the Michaelis–Menten equations for  $\text{H}_2\text{O}_2$  and TMB respectively.

**Table S1.** Comparison of  $K_m$  and  $V_{max}$  with other previously reported literature

| Catalyst                | Substrate                     | $K_m$ (mM) | $V_{max}$                            | Reference |
|-------------------------|-------------------------------|------------|--------------------------------------|-----------|
| HRP                     | TMB                           | 0.434      | 10.0 ( $10^{-8}$ Ms <sup>-1</sup> )  | [1]       |
|                         | H <sub>2</sub> O <sub>2</sub> | 3.702      | 8.71 ( $10^{-8}$ Ms <sup>-1</sup> )  |           |
| N, S-CDs                | TMB                           | 0.387      | 0.167 ( $10^{-8}$ Ms <sup>-1</sup> ) | [2]       |
|                         | H <sub>2</sub> O <sub>2</sub> | 0.106      | 0.530( $10^{-8}$ Ms <sup>-1</sup> )  |           |
| Fe/CeO <sub>2</sub> HBs | TMB                           | 0.52       | 8.84 ( $10^{-8}$ Ms <sup>-1</sup> )  | [3]       |
|                         | H <sub>2</sub> O <sub>2</sub> | 0.36       | 5.83 ( $10^{-8}$ Ms <sup>-1</sup> )  |           |
| S, N-CDs@Ce-MOF         | TMB                           | 1.145      | 5.17 ( $10^{-8}$ Ms <sup>-1</sup> )  | This work |
|                         | H <sub>2</sub> O <sub>2</sub> | 0.828      | 2.50 ( $10^{-8}$ Ms <sup>-1</sup> )  |           |

In addition, we quantitatively measured the specific activity of S, N-CDs@Ce-MOF by measuring the absorbance intensity shown in **Figure S6**. The nanozyme activity (units) was calculated by the following equation,

$$b_{nanozyme} = \frac{V}{(\epsilon \times l)} \times \left( \frac{\Delta A}{\Delta t} \right)$$

Where  $b_{nanozyme}$  is the nanozyme catalytic activity expressed in units,  $V$  is the total volume of the reaction ( $\mu$ L);  $l$  is the path length of light traveling in the cuvette (cm);  $\epsilon$  is the colorimetric substrate molar absorbance coefficient (TMB =  $39,000 \text{ M}^{-1} \text{ cm}^{-1}$ )  $\Delta A/\Delta t$  represents the rate of change at absorbance  $654 \text{ nm min}^{-1}$ . The specific activity of the nanozyme calculated by

$$a_{nanozyme} = b_{nanozyme}/[m]$$

Where,  $a_{nanozyme}$  is specific activity which is expressed in units per milligram ( $\text{U mg}^{-1}$ ),  $m$  is the mass of the nanozyme in  $\text{mg}^4$

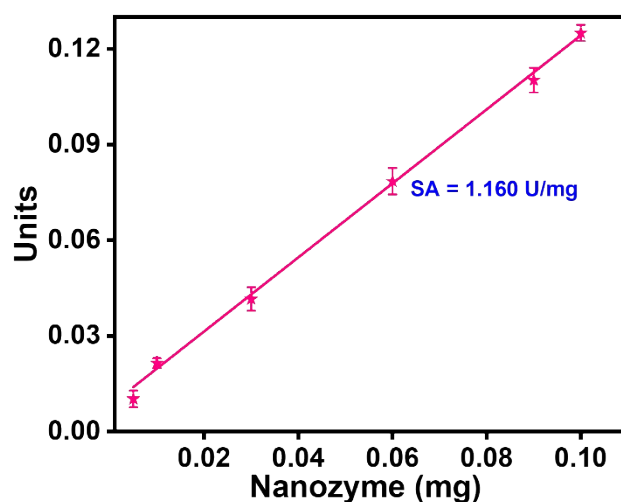

**Figure S6.** Specific activity of S, N-CDs@Ce-MOF

**Table S2.** Comparison of the proposed Hg<sup>2+</sup> sensor with other reported methods

| Sensing Method | Sensing Probe                           | Linear Range           | LOD                  | Reference |
|----------------|-----------------------------------------|------------------------|----------------------|-----------|
| Colorimetric   | ED-AgNPs                                | 0-120 $\mu\text{M}$    | 70 nM                | [5]       |
| Colorimetric   | Gin-AgNPs                               | 0-160 $\mu\text{M}$    | 1.46 $\mu\text{M}$   | [6]       |
| Colorimetric   | Fe <sub>3</sub> O <sub>4</sub> @C@AuNPs | 0.001-25 $\mu\text{M}$ | 0.0435 $\mu\text{M}$ | [7]       |
| Fluorescent    | FA@Ag-Pt QDs                            | 2-20 $\mu\text{M}$     | 40 nM                | [8]       |
| Colorimetric   | S, N-CDs@Ce-MOF                         | 0-0.20 $\mu\text{M}$   | 0.01 $\mu\text{M}$   | This work |

**Table S3.** Comparison of the proposed thiophanate methyl sensor with other reported methods

| Sensing Method | Sensing Probe | Linear Range                 | LOD                | Reference |
|----------------|---------------|------------------------------|--------------------|-----------|
| Colorimetric   | Cit-AgNPs     | 2-100 $\mu\text{M}$          | 0.12 $\mu\text{M}$ | [9]       |
| Fluorescent    | Cu-CDs        | 0.00-0.65 $\mu\text{M}$      | 0.78 $\mu\text{M}$ | [10]      |
| Colorimetric   | Cu@NC         | 0.2-15 $\mu\text{g mL}^{-1}$ | 0.11 $\mu\text{M}$ | [11]      |

- 1 J.-W. Zhang, H.-T. Zhang, Z.-Y. Du, X. Wang, S.-H. Yu and H.-L. Jiang, *Chemical Communications*, 2014, **50**, 1092–1094.
- 2 V. K. Singh, P. K. Yadav, S. Chandra, D. Bano, M. Talat and S. H. Hasan, *J Mater Chem B*, 2018, **6**, 5256–5268.
- 3 L. Chen, X. Zhu, J. Tang, X. Ouyang, Y. Liao, Y. Lu, J. Wang, Z. Wei, B. Xi and L. Tang, *ACS ES&T Water*, 2023, **3**, 2318–2327.
- 4 B. Jiang, D. Duan, L. Gao, M. Zhou, K. Fan, Y. Tang, J. Xi, Y. Bi, Z. Tong, G. F. Gao, N. Xie, A. Tang, G. Nie, M. Liang and X. Yan, *Nat Protoc*, 2018, **13**, 1506–1520.
- 5 A. Jabbar, A. Abbas, N. Assad, M. Naeem-ul-Hassan, H. A. Alhazmi, A. Najmi, K. Zoghebi, M. Al Bratty, A. Hanbashi and H. M. A. Amin, *RSC Adv*, 2023, **13**, 28666–28675.
- 6 K. Plaeyao, R. Kampantha, Y. Korkokklang, C. Talodthaisong, A. Saenchoopa, S. Thammawithan, K. Latpala, R. Patramanon, N. Kayunkid and S. Kulchat, *RSC Adv*, 2023, **13**, 19789–19802.
- 7 B. Motlhaedi, J. Mokone and M. T. Alula, *Inorg Chem Commun*, 2023, **156**, 111296.
- 8 Y. Tang, W. Gou, X. Lv, X. Zhou, J. Hao, C. Sun, T. Sun, L. Hu and Z. Yan, *Food Chem*, 2023, **408**, 135259.
- 9 M. Zheng, Y. Wang, C. Wang, W. Wei, S. Ma, X. Sun and J. He, *Spectrochim Acta A Mol Biomol Spectrosc*, 2018, **198**, 315–321.
- 10 X. Yue, C. Zhu, R. Gu, J. Hu, Y. Xu, S. Ye and J. Zhu, *Foods*, , DOI:10.3390/foods11213336.
- 11 M. Zhang, Y. Wang, N. Li, D. Zhu and F. Li, *Biosens Bioelectron*, 2023, **237**, 115554.
